# Supplementary material for: Methods to Determine the Transcriptomes of Trypanosomes in Mixtures with Mammalian Cells: The Effects of Parasite Purification and Selective cDNA Amplification
Source: PubMed Central journal article supplement (PMC3990519; doi:10.1371/journal.pntd.0002806), 2014-04-17

Color Key

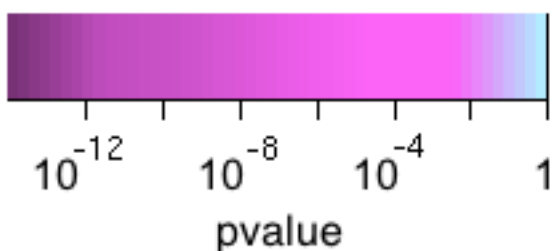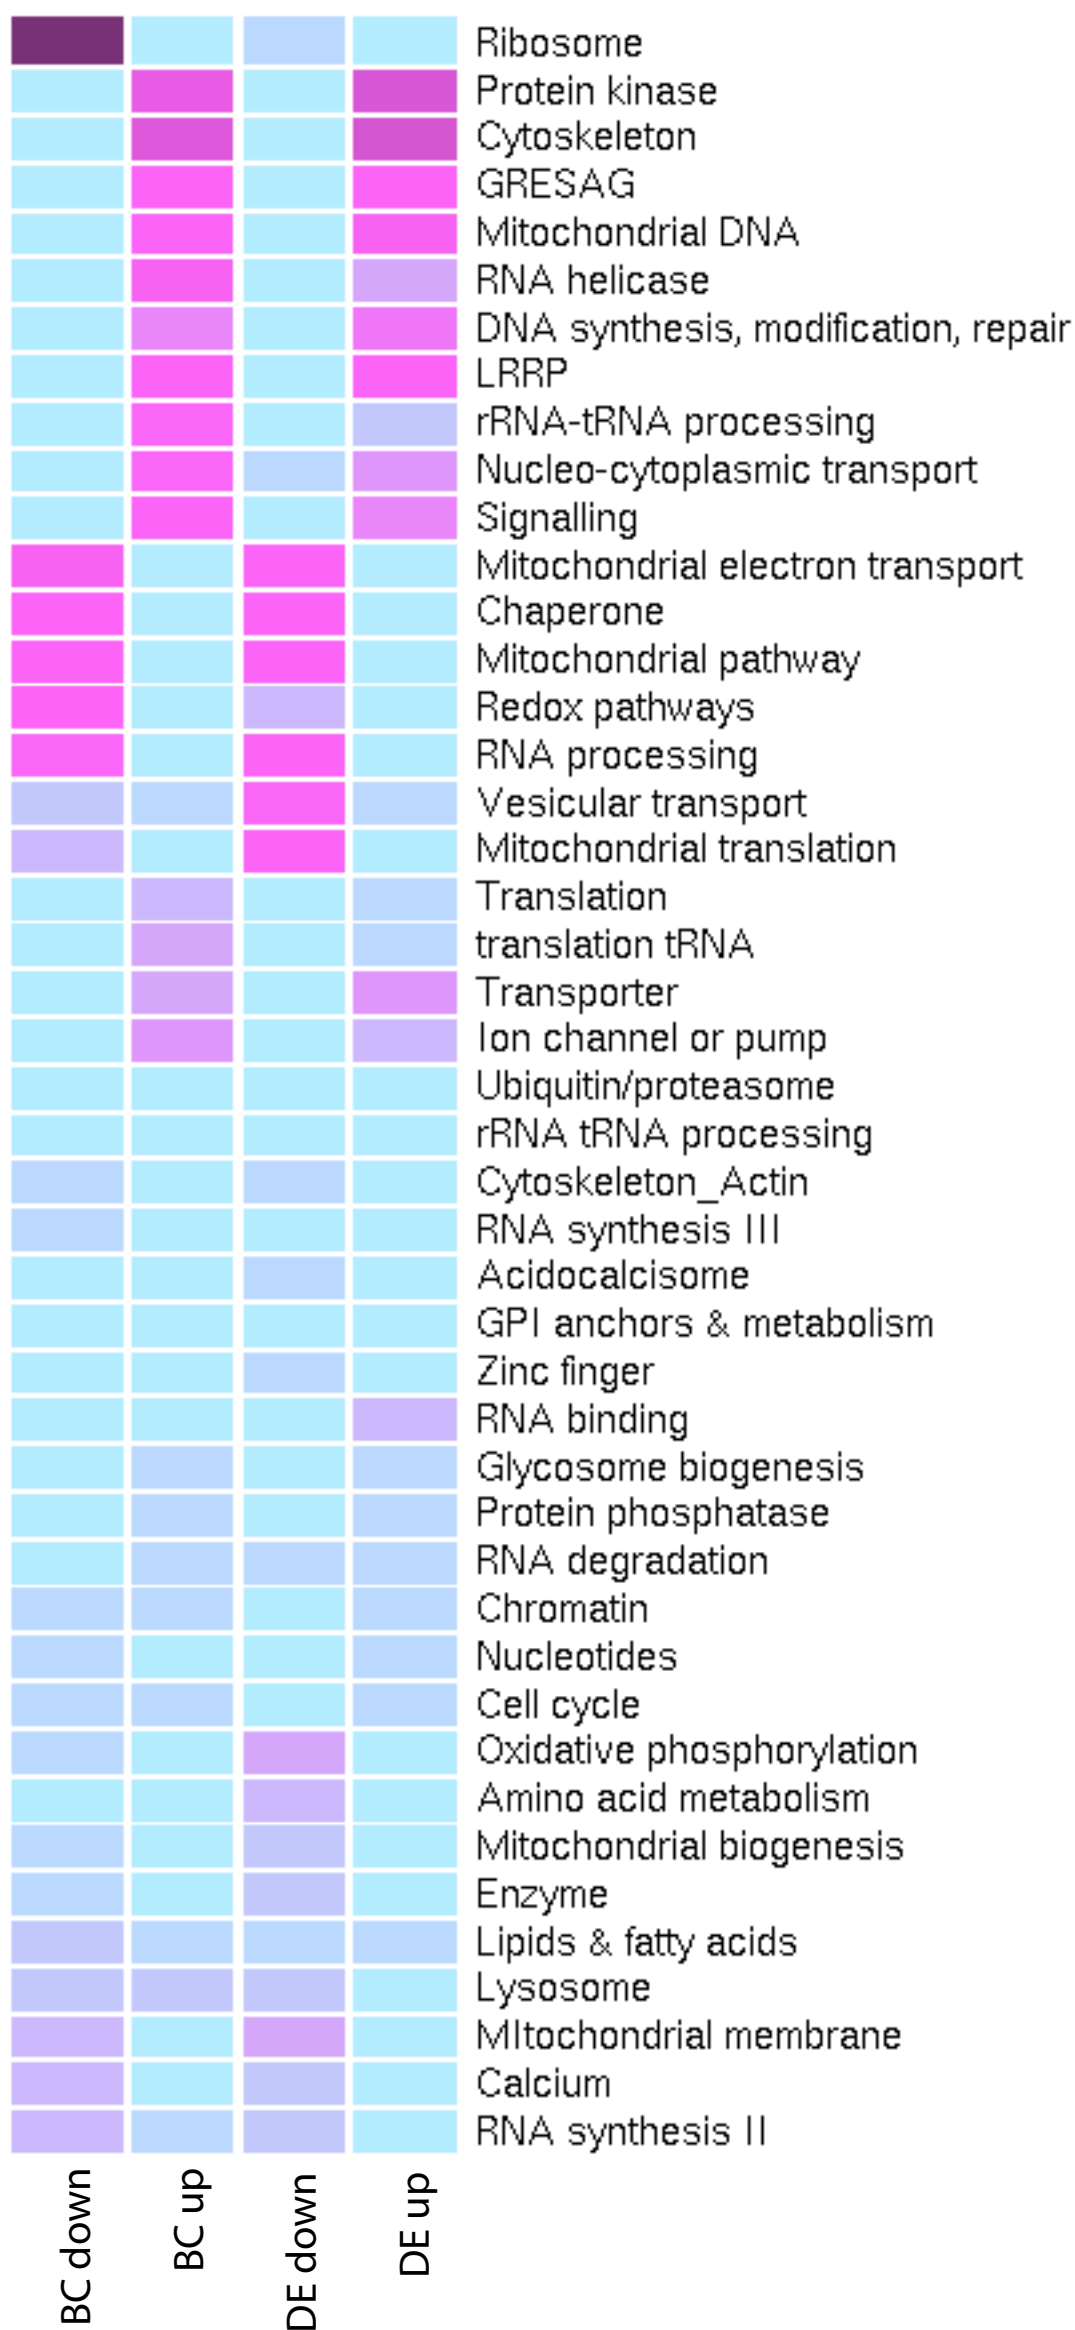

Supplement: pntd.0002806.s002.pdf [file pntd.0002806.s002.pdf]
